# Supplementary material for: Multifunctional inhibitors of β-amyloid aggregation based on MoS2/AuNR nanocomposites with high near-infrared absorption
Source: Royal Society of Chemistry journal article supplement (doi:10.1039/c9nr01845j), 2019-01-01
Supplement: c9nr01845j1.pdf [file c9nr01845j1.pdf]

## SUPPORTING INFORMATION

### Multifunctional inhibitors of $\beta$ -amyloid aggregation based on $\text{MoS}_2/\text{AuNRs}$ nanocomposites with high near-infrared absorption

Xinhuan Wang<sup>[-],a</sup>, Qiusen Han<sup>[-],a,b</sup>, Xueliang Liu<sup>a</sup>, Chen Wang<sup>\*a,b</sup>, Rong Yang<sup>\*a,b</sup>

a. CAS Key Laboratory for Biomedical Effects of Nanomaterials and Nanosafety, Center of Materials Science and Optoelectronics Engineering, CAS Center for Excellence in Nanoscience, National Center for Nanoscience and Technology, University of Chinese Academy of Sciences, Beijing, 100049, P. R. China

b. Sino-Danish College, Sino-Danish Center for Education and Research, University of Chinese Academy of Sciences, Beijing, 100049, P. R. China

\* Corresponding author: yangr@nanoctr.cn, wangch@nanoctr.cn

† Supporting information for this article is available

[-] These authors contributed equally to this work.

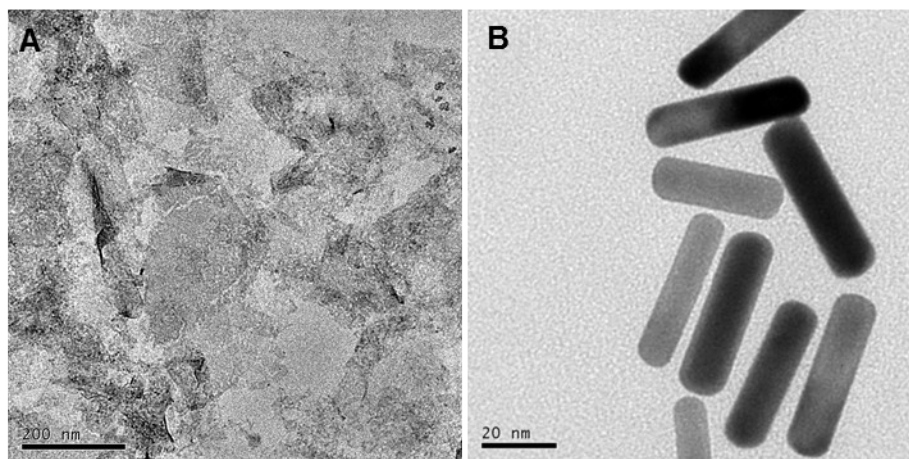

Fig.S1 TEM images of  $\text{MoS}_2$  nanosheets (A) and AuNRs (B).

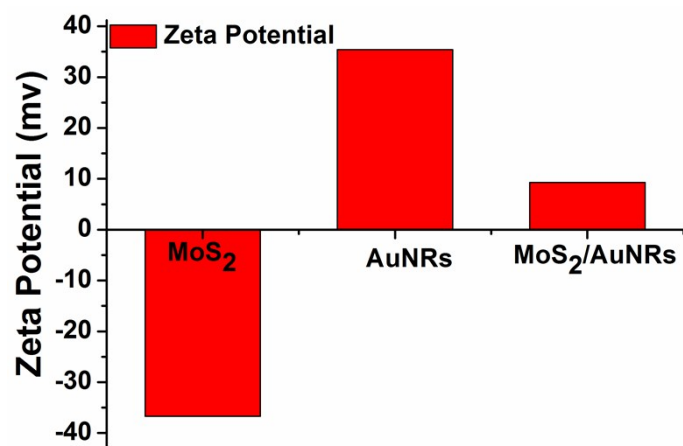

Fig.S2 Zeta Potentials of MoS<sub>2</sub>, AuNRs and MoS<sub>2</sub>/AuNRs.

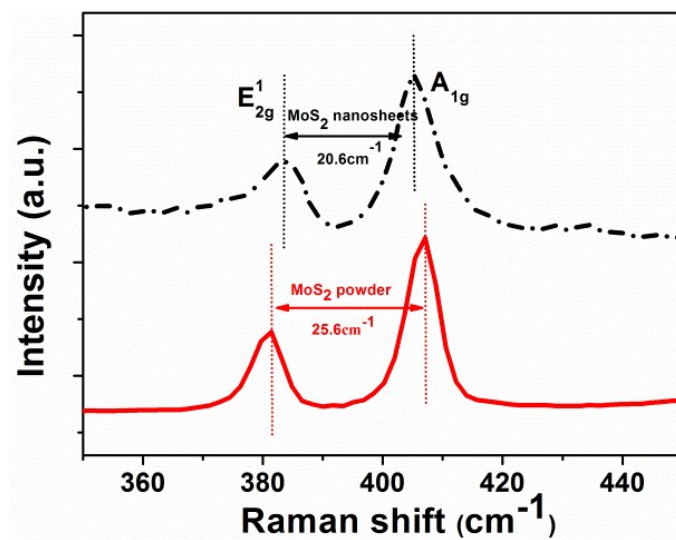

Fig.S3 Raman spectra of MoS<sub>2</sub> powder and nanosheets.

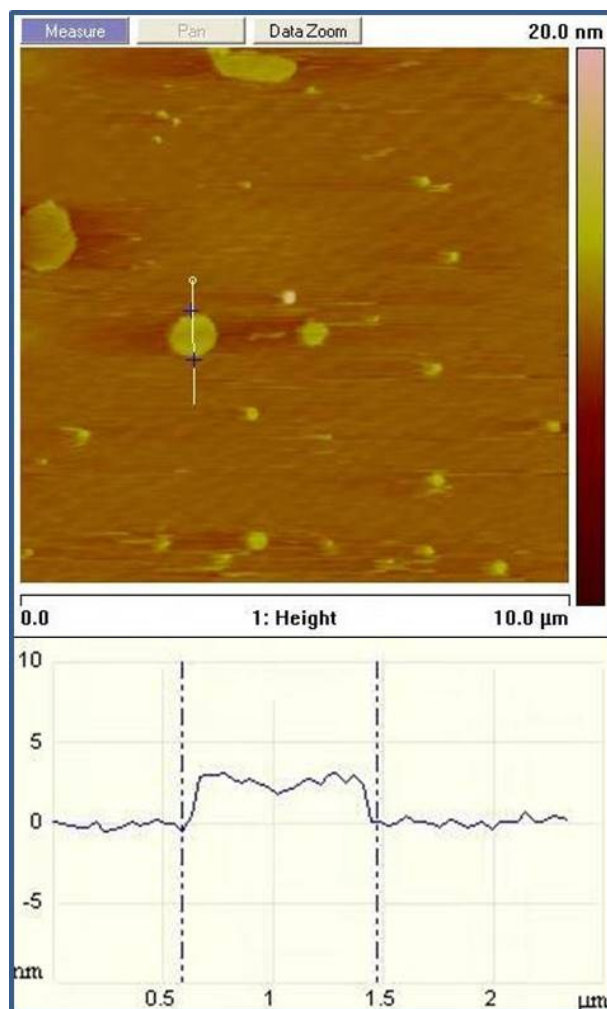

Fig.S4 AFM image of MoS<sub>2</sub> nanosheets.

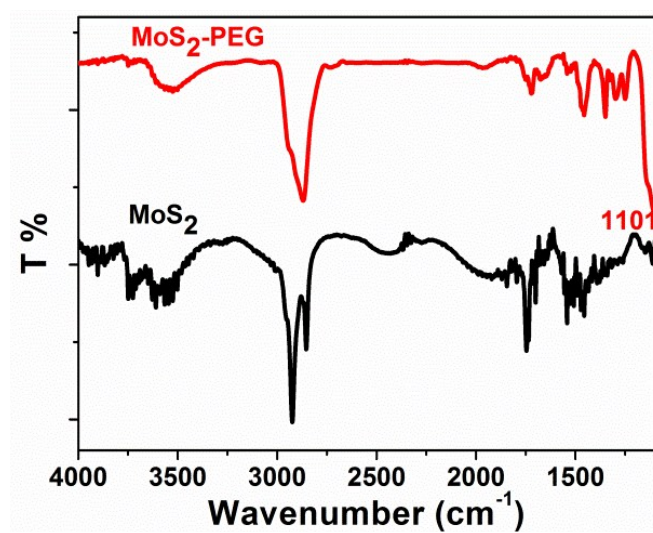

Fig.S5 FT-IR spectra acquired in MoS<sub>2</sub> nanosheets before and after PEGylation.

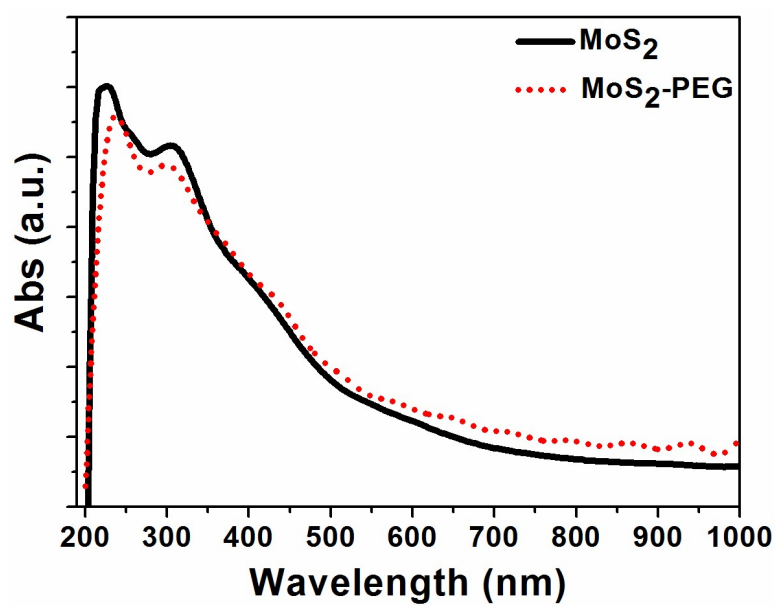

Fig.S6 UV-vis-NIR spectra of MoS<sub>2</sub> nanosheets before and after PEGylation

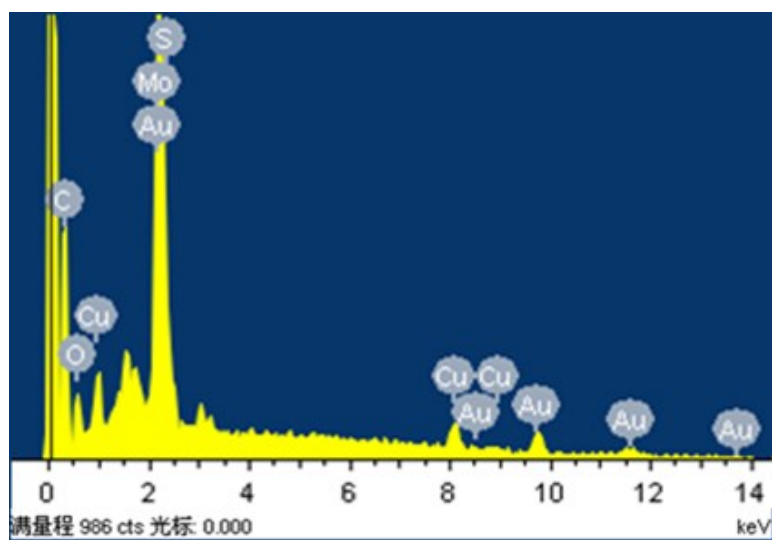

Fig.S7 EDX spectrum of MoS<sub>2</sub>/AuNRs.

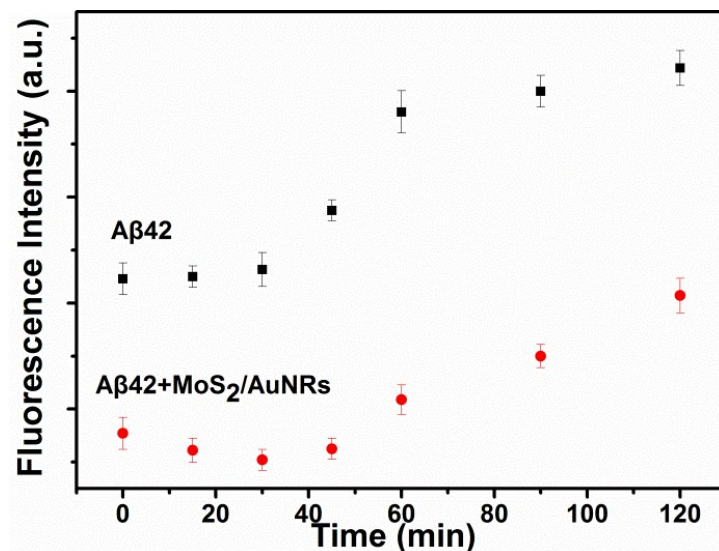

Fig.S8 ThT fluorescence spectra of Aβ42 in the absence and presence of MoS<sub>2</sub>/AuNRs nanocomposites

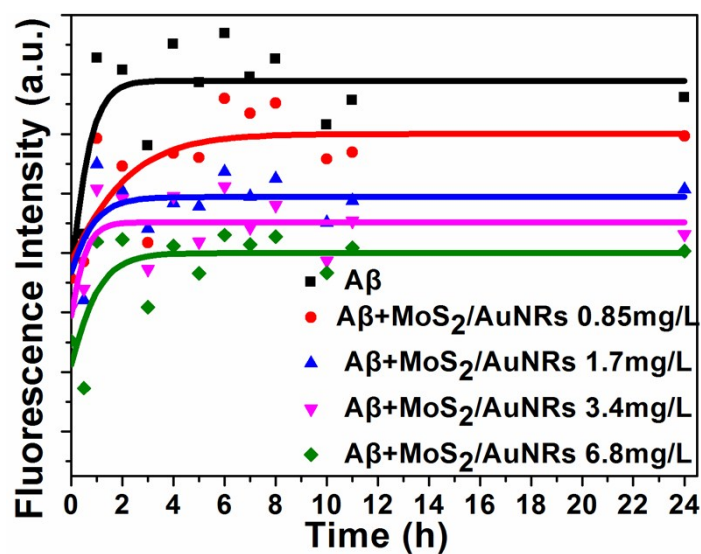

Fig.S9 ThT fluorescence spectra of Aβ peptides incubated with different concentration of MoS<sub>2</sub>/AuNRs.

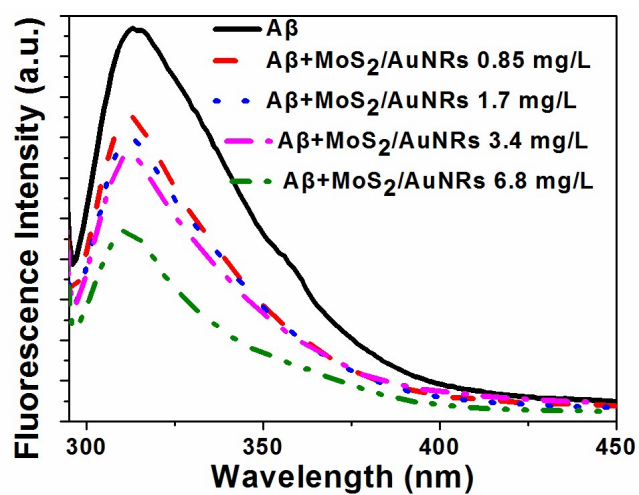

Fig.S10 Tyrosine spectra of Aβ monomers incubated with different concentration of MoS<sub>2</sub>/AuNRs for 48 h.

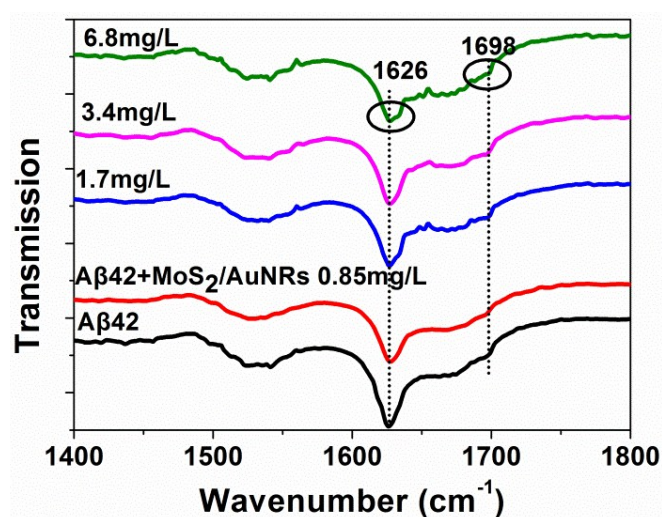

Fig.S11 FT-IR spectra of Aβ monomers incubated with different concentration of MoS<sub>2</sub>/AuNRs for 48 h.

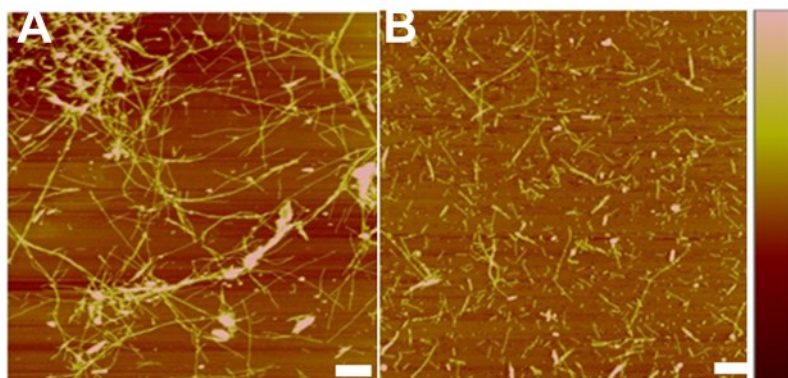

Fig.S12 AFM images of Aβ fibrils alone (A) and in the presence of MoS<sub>2</sub>/AuNRs, respectively. The scale bar is 2 μm.

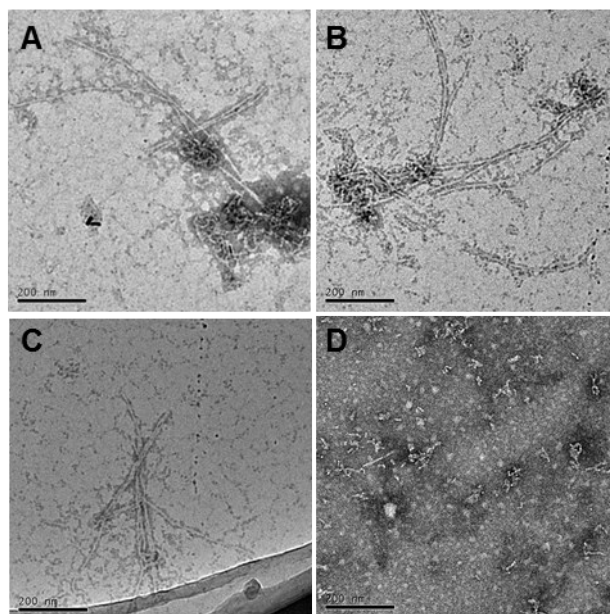

Fig.S13 TEM images of A $\beta$  fibrils after 7 day-incubated with A $\beta$ 42 monomers with different concentration of MoS<sub>2</sub>/AuNRs. (A) 0.85 mg L<sup>-1</sup> (B) 1.7 mg L<sup>-1</sup> (C) 3.4 mg L<sup>-1</sup> (D) 6.8 mg L<sup>-1</sup>

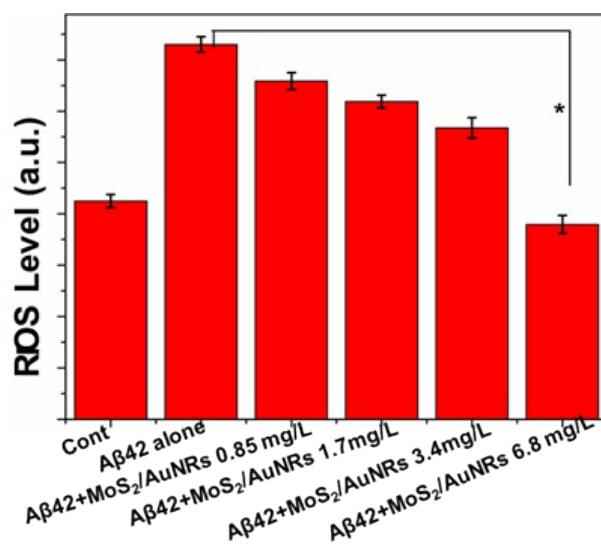

Fig.S14 ROS level of A $\beta$  monomers incubated with different concentrations of MoS<sub>2</sub>/AuNRs for 48 h.

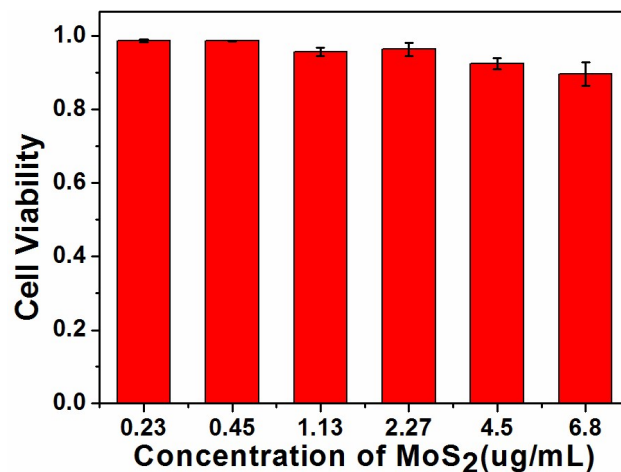

Fig.S15 Viability of SY5Y cells measured via MTT assay after incubation with different concentration of MoS<sub>2</sub> nanosheets.

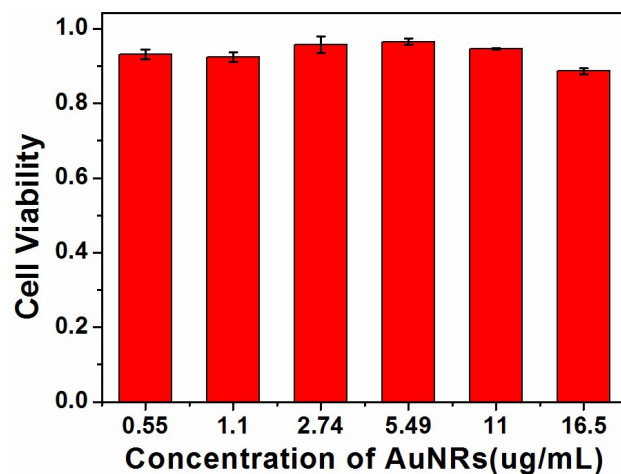

Fig.S16 Viability of SY5Y cells measured via MTT assay after incubation with different concentration of AuNRs.

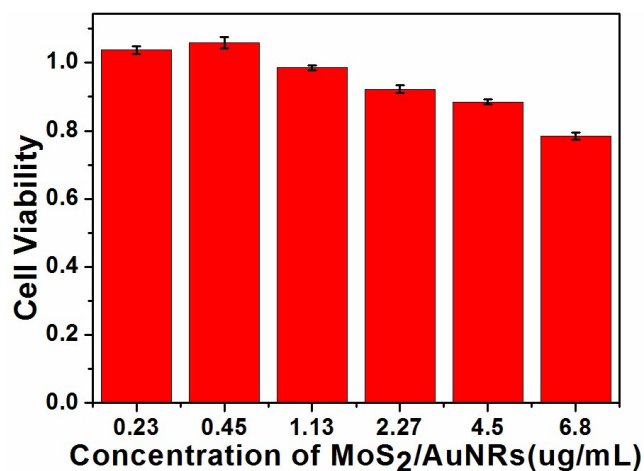

Fig.S17 Viability of SY5Y cells measured via MTT assay after incubation with different concentration of MoS<sub>2</sub>/AuNRs nanocomposites.

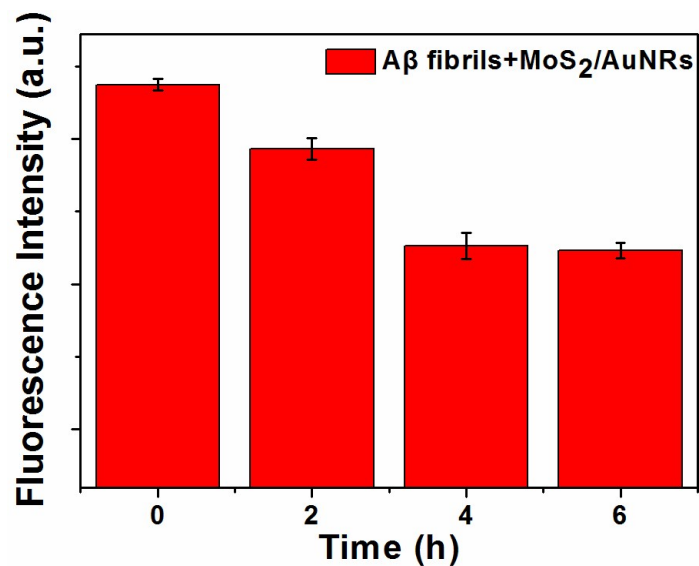

Fig.S18 Disaggregation effects of Aβ fibrils in the presence of MoS<sub>2</sub>/AuNRs with incubation time increasing.

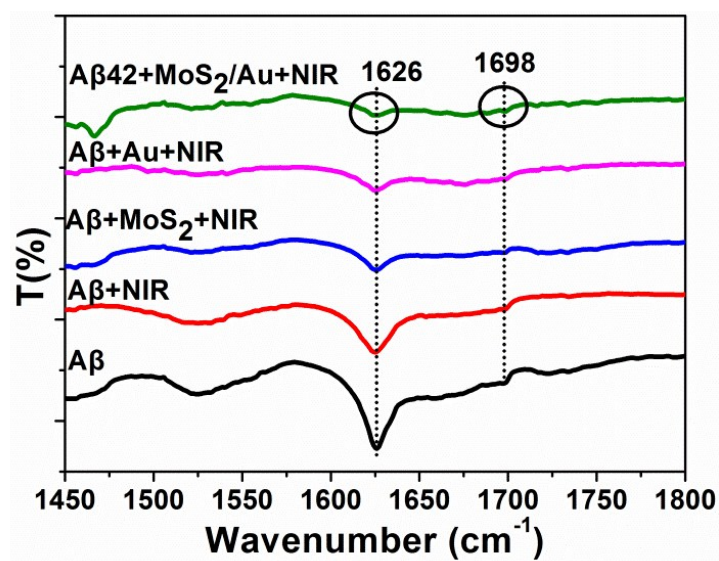

Fig.S19. FT-IR spectra of Aβ<sub>42</sub> fibrils after 2 h incubation with AuNRs, MoS<sub>2</sub> or MoS<sub>2</sub>/AuNRs with or without 10 min NIR irradiation. The Aβ<sub>42</sub> fibrils have been incubated for 48 h.

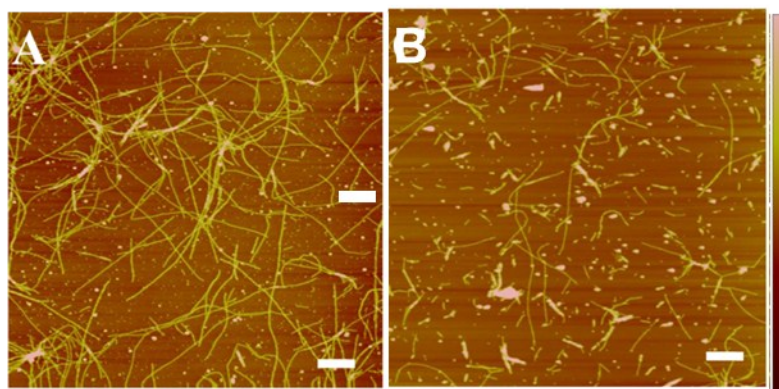

Fig.S20. AFM images of the Aβ42 fibrils alone (A) and treated with MoS<sub>2</sub>/AuNRs (B). Both samples were then irradiated by NIR for 10 min. The scale bar is 2 μm.

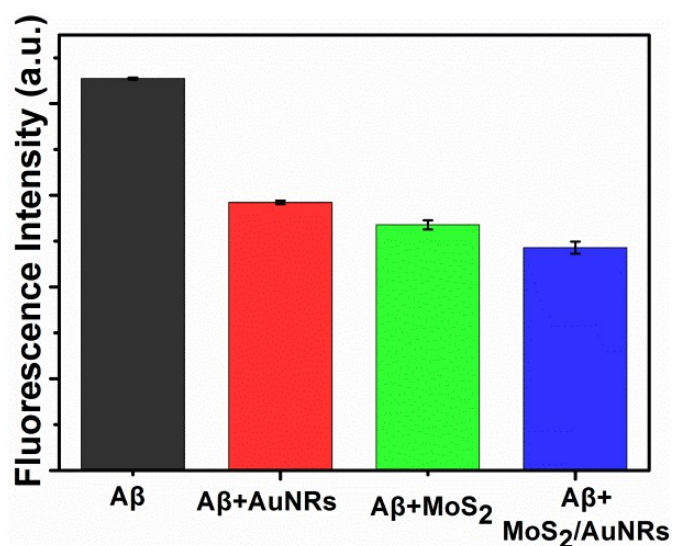

Fig.S21. Tyrosine spectra of Aβ42 fibrils after 2 h incubation with AuNRs, MoS<sub>2</sub> or MoS<sub>2</sub>/AuNRs. The Aβ42 fibrils have been incubated for 48 h.
